# Supplementary material for: A Rare Case of Localized Argyria on the Face
Source: PubMed Central journal article supplement — Case Rep Dermatol. 2019 Feb 13;11(1):23–7. doi: 10.1159/000494610 (PMC6477469; doi:10.1159/000494610), 2019-02-13
Supplement: cde-0011-0023-s01.pdf [file cde-0011-0023-s01.pdf]

| Study                                                                                                                                    | Case                                                                                                                                                                          | Treatment    |
|------------------------------------------------------------------------------------------------------------------------------------------|-------------------------------------------------------------------------------------------------------------------------------------------------------------------------------|--------------|
| Kamiya et al [1]. Localized cutaneous argyria in a silversmith                                                                           | silversmith                                                                                                                                                                   | No treatment |
| Beutler et al [2]. Localized cutaneous argyria: Report of two patients and literature review                                             | sites directly adjacent to ear piercings                                                                                                                                      | No treatment |
| McClain et al [3]. Localized cutaneous argyria: two case reports and clinicopathologic review.                                           | Case 1: Localized argyria since childhood resembling blue nevus<br>Case 2: Remote history of occupational exposure to silver, blue macule on left thumb                       | No treatment |
| Karakasli et al [4]. Dermal argyria: Cutaneous manifestation of a megaprosthesis for distal femoral osteosarcoma                         | Development of permanent blue-gray discoloration over incision site one year post silver coated tibial/femoral prosthesis implantation                                        | No treatment |
| Kubba et al [5]. Argyria an unrecognized cause of cutaneous pigmentation in Indian patients: a case series and review of the literature. | 4 patients presenting with grey-blue pigmentation particularly in sun-exposed areas after long-term ingestion of silver coated cardamoms and betel nut, respectively          | No treatment |
| Garcias-Ladaria et al [6]. Localized cutaneous argyria: a report of 2 cases.                                                             | Blue macules on right fourth finger for 5-10 years and on the dorsum of both hands for 5 years, respectively, after occupational exposure to silver for 30+ years as jewelers | No treatment |
| Hristov et al [7]. Localized cutaneous argyria.                                                                                          | Solitary, blue-gray papule on the elbow resembling a blue nevus due to potential traumatic entrance of mirror fragments into the skin                                         | No treatment |
| Krejci-Manwaring et al [8]. What is your diagnosis? Argyria.                                                                             | Gray skin discoloration, esp. on the face and arms, after daily consumption of 1 qt of colloidal silver water for 1 year                                                      | No treatment |

|                                                                                                                                         |                                                                                                                                                                     |                                                                                                                                                              |
|-----------------------------------------------------------------------------------------------------------------------------------------|---------------------------------------------------------------------------------------------------------------------------------------------------------------------|--------------------------------------------------------------------------------------------------------------------------------------------------------------|
| Rumayor Piña et al [9]. Cutaneous amalgam tattoo in a dental professional: an unreported occupational argyria.                          | Dark macule on face, presumptively acquired due to trauma while working as a dentist                                                                                | Surgical removal                                                                                                                                             |
| Han et al [10]. Successful treatment of argyria using a low-fluence Q-switched 1064-nm Nd:YAG laser.                                    | Blue-gray skin discoloration of the face, sclera, conjunctivae, gingiva, soft palate after the daily consumption of 1 liter of colloidal silver solution for 1 year | Q-switched 1064 nm Nd:YAG laser (0.7-1.3 J/cm <sup>2</sup> , pulse duration: 5 ns, 7 mm spot size laser-toning) → normal skin color after 7 laser treatments |
| Garcia-Martinez et al [11]. In vivo reflectance confocal microscopy characterization of silver deposits in localized cutaneous argyria. | Multiple blue to black macules on left forearm and hand in a silversmith                                                                                            | No treatment                                                                                                                                                 |
| Alés-Fernández et al [12]. Localized argyria secondary to acupuncture mimicking blue nevus.                                             | secondary to an acupuncture needle                                                                                                                                  | No treatment                                                                                                                                                 |
| Schrauben et al [13]. A case of argyria: multiple forms of silver ingestion in a patient with comorbid schizoaffective disorder.        |                                                                                                                                                                     |                                                                                                                                                              |
| Gorayski et al [14]. Severe acute radiation dermatitis in a patient with argyria.                                                       | Generalized argyria after colloidal silver consumption for 10 months, concomitant Merkel cell carcinoma                                                             | Argyria: no treatment                                                                                                                                        |
| Rackoff et al [15]. Localized cutaneous argyria from an                                                                                 | localized cutaneous argyria from an acupuncture needle                                                                                                              | No treatment                                                                                                                                                 |

|                                                                                                                                                           |                                                                                                                                                                                                                                                                                                                                                                                                            |                                       |
|-----------------------------------------------------------------------------------------------------------------------------------------------------------|------------------------------------------------------------------------------------------------------------------------------------------------------------------------------------------------------------------------------------------------------------------------------------------------------------------------------------------------------------------------------------------------------------|---------------------------------------|
| acupuncture needle clinically concerning for metastatic melanoma.                                                                                         |                                                                                                                                                                                                                                                                                                                                                                                                            |                                       |
| Amber et al [16].<br>Blue skin.                                                                                                                           | Blue discoloration of the eyes, face, neck, fingernails after daily consumption of half a cup of colloidal silver for 15 to 20 years                                                                                                                                                                                                                                                                       | No treatment                          |
| Morton et al [17].<br>Localized argyria caused by silver earrings.                                                                                        | caused by silver earrings                                                                                                                                                                                                                                                                                                                                                                                  | No treatment                          |
| Utikal et al [19].<br>Local cutaneous argyria mimicking melanoma metastases in a patient with disseminated melanoma.                                      | Blue-black macules and papules on left leg after application of 0.1% silver nitrate cream twice daily for 5 weeks                                                                                                                                                                                                                                                                                          | Spontaneous resolution within 4 weeks |
| Pariser [20].<br>Generalized argyria.<br>Clinicopathologic features and histochemical studies.                                                            | Case 1: Gray skin discoloration, esp. on the face, arms, and neck, histology: silver deposition<br>Case 2: Faint bluish discoloration of the proximal nail beds, history of silver-containing nose drop use<br>Case 3: 58 yo M, history of having his throat painted with silver protein from age 3 to 12 to prevent and treat colds, discoloration of the skin since childhood that decreased as an adult | No treatment                          |
| Shall et al [21].<br>An unusual case of acquired localized argyria.                                                                                       | Blue-grey, slowly enlarging lesion behind the left ear, most likely due to silver earring back                                                                                                                                                                                                                                                                                                             | Surgical excision                     |
| Dietl et al [22].<br>Brain involvement in generalized argyria.                                                                                            | autopsy study                                                                                                                                                                                                                                                                                                                                                                                              | No treatment                          |
| Suzuki et al [23].<br>Localized argyria with chrysiasis caused by implanted acupuncture needles.<br>Distribution and chemical forms of silver and gold in | Pigmented macules on forehead and neck, status post acupuncture needle treatment & onset of the development of blue-black macules 1 year later                                                                                                                                                                                                                                                             | No treatment                          |

|                                                                                                                                                     |                                                                                                                                           |                                                                                                                                                                                                          |
|-----------------------------------------------------------------------------------------------------------------------------------------------------|-------------------------------------------------------------------------------------------------------------------------------------------|----------------------------------------------------------------------------------------------------------------------------------------------------------------------------------------------------------|
| cutaneous tissue by electron microscopy and x-ray microanalysis.                                                                                    |                                                                                                                                           |                                                                                                                                                                                                          |
| Sarasa et al [24]. Cutaneous argyria.                                                                                                               |                                                                                                                                           |                                                                                                                                                                                                          |
| Browning et al [25]. Argyria attributed to silvadene application in a patient with dystrophic epidermolysis bullosa.                                | argyria following application of silver sulfadiazine in a patient with epidermolysis bullosa                                              | no treatment                                                                                                                                                                                             |
| Brandt et al [26]. Argyria secondary to ingestion of homemade silver solution.                                                                      | Blue-gray discoloration of sun-exposed skin after the daily consumption of 237 ml of colloidal silver solution for 4 days                 | No treatment                                                                                                                                                                                             |
| White et al [27]. Severe generalized argyria secondary to ingestion of colloidal silver protein.                                                    | Skin discoloration of the face, neck, arms, hands, and scalp after daily consumption of colloidal silver protein solution for over 1 year | No treatment                                                                                                                                                                                             |
| Friedmann et al [28]. Localized Cutaneous Argyria From a Nasal Piercing Successfully Treated with a Picosecond 755-nm Q-Switched Alexandrite Laser. | Blue-gray macule on right nasal ala after the use of a silver-containing nasal piercing before healing was completed                      | Picosecond 755-nm Q-switched alexandrite laser (750 ps pulse duration, 3 mm spot size, 2.83 J/cm <sup>2</sup> fluence, 10 Hz frequency) Improvement/return to normal skin color after 2 laser treatments |
| Saager et al [29]. Quantitative near infrared spectroscopic analysis of Q-Switched Nd:YAG treatment of generalized argyria                          | Generalized blue-gray skin discoloration after consumption of a colloidal silver solution for 10 months                                   | Q-switched 1,064 nm Nd:YAG laser treatment (3–6 mm spot size; 0.8–2 J/cm <sup>2</sup> ) No recurrence at 1-year follow-up                                                                                |

|                                                                                                                                                                                      |                                                                                                                                  |                                                                                                                                                                    |
|--------------------------------------------------------------------------------------------------------------------------------------------------------------------------------------|----------------------------------------------------------------------------------------------------------------------------------|--------------------------------------------------------------------------------------------------------------------------------------------------------------------|
| Hovenic et al [30]. Treatment of argyria using the quality-switched 1,064-nm neodymium-doped yttrium aluminum garnet laser: efficacy and persistence of results at 1-year follow-up. | Gray-blue skin discoloration due to colloidal silver ingestion, status post hydroquinone treatment without success               | Q-switched 1,064 nm Nd:YAG laser treatment (8 mm spot size; 1.5 J/cm <sup>2</sup> fluence)<br>No recurrence at 1-year follow-up                                    |
| Rhee et al [31]. Treatment of argyria after colloidal silver ingestion using Q-switched 1,064-nm Nd:YAG laser.                                                                       | Gray skin discoloration of the face and hands after with colloidal silver ingestions for 2 weeks                                 | Q-switched 1,064-nm Nd:YAG laser treatment (5 nanoseconds pulse duration, 2 mm spot size; 6.5 J/cm <sup>2</sup> fluence)                                           |
| Gottesman et al [32]. Immediate successful treatment of argyria with a single pass of multiple Q-switched laser wavelengths.                                                         | Blue-gray skin discoloration on sun-exposed skin                                                                                 | Trial treatment with 3 different Q-switched laser wavelengths: ruby at 694 nm, alexandrite at 755 nm, and Nd:YAG at 1064 nm, immediate clearing with all 3 lasers. |
| Park et al [33]. An Effective Modality for Argyria Treatment: Q-Switched 1,064-nm Nd:YAG Laser.                                                                                      | Blue-gray skin discoloration on the face after colloidal silver ingestion for 2 years                                            | Q-switched 1,064 nm Nd:YAG laser treatment (6 nanoseconds pulse duration, 4 mm spot size; 8 J/cm <sup>2</sup> fluence)                                             |
| Fisher et al [34]. Scar-localized argyria secondary to silver sulfadiazine cream.                                                                                                    | Blue-gray chest discoloration status post CABG complicated by delayed wound healing and treatment with silver sulfadiazine cream | No treatment.                                                                                                                                                      |
| Okan et al [37]. So what if you are blue? Oral colloidal silver and argyria are out: safe dressings are in.                                                                          | Gray-blue skin discoloration after daily colloidal silver consumption of 1.5 to 2.5 mg for 2 years                               | No treatment                                                                                                                                                       |

|                                                                                                                                            |                                                                                                                                                |                                                                                                                            |
|--------------------------------------------------------------------------------------------------------------------------------------------|------------------------------------------------------------------------------------------------------------------------------------------------|----------------------------------------------------------------------------------------------------------------------------|
| Gülseren et al [38]. Reflectance confocal microscopy and dermatopathologic findings of cutaneous argyria after colloidal silver ingestion. | Blue-grey skin discoloration of the face and neck after colloidal silver consumption for 6 months                                              | No treatment                                                                                                               |
| Kwon et al [39]. A case of argyria following colloidal silver ingestion.                                                                   | Gray skin discoloration of the after daily consumption of colloidal silver for 5+ years                                                        | Improvement after discontinuation of colloidal silver, use of sunscreen                                                    |
| Fox et al [40]. Chromonychia in an Asymptomatic Vitamin Consumer.                                                                          | Azure lunulae of argyria, history of self-treatment of sore throats with 0.5 mg per serving silver dilutions for 20+ years                     | No treatment due to concern for possible side effects of 1,064-nm Q-switched Nd:YAG laser on nails                         |
| Massi et al [41]. Human generalized argyria: a submicroscopic and X-ray spectroscopic study.                                               |                                                                                                                                                |                                                                                                                            |
| Jung et al [42]. A case of generalized argyria presenting with muscle weakness.                                                            | Gray-blue patches on the face and nails after daily consumption of 0.8 to 1.2 l colloidal silver solution for 1 year, concomitant polymyositis | Weakness: steroid taper, discharge to rehab on 22 <sup>nd</sup> day of hospitalization<br>Skin discoloration: no treatment |
| Pardo-Peret et al [43]. Argyriasis. Report of a case                                                                                       | Gray-blue generalized skin, nail, hair, oral and gingival mucosa discoloration after a 25-month history of colloidal silver ingestion          | No treatment                                                                                                               |
| Maitre et al [44]. Increased serum and urinary levels of silver during treatment with topical silver sulfadiazine.                         | Systemic argyria in two cases of per cutaneous intoxication with topical silver sulfadiazine.                                                  | No treatment                                                                                                               |

Supplementary Table 1

Treatment for cutaneous argyria includes discontinuation of the causing agent, as well as sun protection to avoid reactions with UV light [5 37 39]. For refractory skin discolorations, treatment with Q-switched 1,064-nm Nd:YAG laser, or alternatively 694 nm ruby or 755 nm alexandrite, has been shown to be effective in several case reports, with the number of sessions varying from one to seven [10 28-33]. A potentially limiting side effect of laser therapy is significant pain during treatment [29].

1. Kamiya K, Yamasaki O, Tachikawa S, Iwatsuki K. Localized cutaneous argyria in a silversmith. *European journal of dermatology : EJD* 2013;**23**(1):112-3 doi: 10.1684/ejd.2012.1894[published Online First: Epub Date]].
2. Beutler BD, Lee RA, Cohen PR. Localized cutaneous argyria: Report of two patients and literature review. *Dermatology online journal* 2016;**22**(11)
3. McClain CM, Kantrow SM, Abraham JL, Price J, Parker ER, Robbins JB. Localized cutaneous argyria: two case reports and clinicopathologic review. *The American Journal of dermatopathology* 2013;**35**(7):e115-8 doi: 10.1097/DAD.0b013e318284e37b[published Online First: Epub Date]].
4. Karakasli A, Hapa O, Akdeniz O, Havitcioğlu H. Dermal argyria: Cutaneous manifestation of a megaprosthesis for distal femoral osteosarcoma. *Indian Journal of Orthopaedics* 2014;**48**(3):326-8 doi: 10.4103/0019-5413.132528[published Online First: Epub Date]].
5. Kubba A, Kubba R, Batrani M, Pal T. Argyria an unrecognized cause of cutaneous pigmentation in Indian patients: a case series and review of the literature. *Indian journal of dermatology, venereology and leprology* 2013;**79**(6):805-11 doi: 10.4103/0378-6323.120735[published Online First: Epub Date]].
6. Garcias-Ladaria J, Hernandez-Bel P, Torregrosa-Calatayud JL, Martinez-Aparicio A. Localized cutaneous argyria: a report of 2 cases. *Actas dermo-sifiliograficas* 2013;**104**(3):253-4 doi: 10.1016/j.ad.2012.03.013[published Online First: Epub Date]].
7. Hristov AC, High WA, Golitz LE. Localized cutaneous argyria. *Journal of the American Academy of Dermatology* 2011;**65**(3):660-61 doi: 10.1016/j.jaad.2010.05.016[published Online First: Epub Date]].
8. Krejci-Manwaring J, West DA, Aires DJ. What is your diagnosis? Argyria. *Cutis* 2013;**91**(5):224, 33-4
9. Rumayor Pina A, Martinez Martinez M, Toral Rizo VH, Ajudarte Lopes M, Paes de Almeida O. Cutaneous amalgam tattoo in a dental professional: an unreported occupational argyria. *The British journal of dermatology* 2012;**167**(5):1184-5 doi: 10.1111/j.1365-2133.2012.11021.x[published Online First: Epub Date]].
10. Han TY, Chang HS, Lee HK, Son SJ. Successful treatment of argyria using a low-fluence Q-switched 1064-nm Nd:YAG laser. *International journal of dermatology* 2011;**50**(6):751-3 doi: 10.1111/j.1365-4632.2010.04796.x[published Online First: Epub Date]].
11. Garcia-Martinez P, Lopez Aventin D, Segura S, et al. In vivo reflectance confocal microscopy characterization of silver deposits in localized cutaneous argyria. *The British journal of dermatology* 2016;**175**(5):1052-55 doi: 10.1111/bjd.14571[published Online First: Epub Date]].
12. Ales-Fernandez M, Rios-Martin JJ, Camacho-Martinez FM. Localized argyria secondary to acupuncture mimicking blue nevus. *Journal of drugs in dermatology : JDD* 2010;**9**(8):1019-20
13. Schrauben SJ, Bhanusali DG, Sheets S, Sinha AA. A case of argyria: multiple forms of silver ingestion in a patient with comorbid schizoaffective disorder. *Cutis* 2012;**89**(5):221-4
14. Gorayski P, Pinkham MB, Muir JB, Pullar AP. Severe Acute Radiation Dermatitis in a Patient with Argyria. *Case Reports in Oncological Medicine* 2014;**2014** doi: 10.1155/2014/154349[published Online First: Epub Date]].
15. Rackoff EM, Benbenisty KM, Maize JC, Maize JC, Jr. Localized cutaneous argyria from an acupuncture needle clinically concerning for metastatic melanoma. *Cutis* 2007;**80**(5):423-6
16. Amber KT, Winslow CY, Styperek A, Schwartz PH, Shiman MI, Elgart G. Blue skin. *International journal of dermatology* 2014;**53**(3):275-6 doi: 10.1111/ijd.12344[published Online First: Epub Date]].

17. Morton CA, Fallowfield M, Kemmett D. Localized argyria caused by silver earrings. *The British journal of dermatology* 1996;**135**(3):484-5
18. Colomb D, David D. [Cutaneous argyria]. *Bulletin de la Societe francaise de dermatologie et de syphiligraphie* 1968;**75**(4):522-3
19. Utikal J, Thoenke A, Becker JC, et al. Local cutaneous argyria mimicking melanoma metastases in a patient with disseminated melanoma. *Journal of the American Academy of Dermatology* 2006;**55**(5 Suppl):S92-4 doi: 10.1016/j.jaad.2005.10.062[published Online First: Epub Date]].
20. Pariser RJ. Generalized argyria. Clinicopathologic features and histochemical studies. *Archives of dermatology* 1978;**114**(3):373-7
21. Shall L, Stevens A, Millard LG. An unusual case of acquired localized argyria. *The British journal of dermatology* 1990;**123**(3):403-7
22. Dietl HW, Anzil AP, Mehraein P. Brain involvement in generalized argyria. *Clinical neuropathology* 1984;**3**(1):32-6
23. Suzuki H, Baba S, Uchigasaki S, Murase M. Localized argyria with chrysiasis caused by implanted acupuncture needles. Distribution and chemical forms of silver and gold in cutaneous tissue by electron microscopy and x-ray microanalysis. *Journal of the American Academy of Dermatology* 1993;**29**(5 Pt 2):833-7
24. Sarasa JL, Vega F, Lopez-Linares M, Navarro V, Oliva H. [Cutaneous argyria]. *Revista clinica espanola* 1972;**127**(4):877-82
25. Browning JC, Levy ML. Argyria attributed to silvadene application in a patient with dystrophic epidermolysis bullosa. *Dermatology online journal* 2008;**14**(4):9
26. Brandt D, Park B, Hoang M, Jacobe HT. Argyria secondary to ingestion of homemade silver solution. *Journal of the American Academy of Dermatology* 2005;**53**(2 Suppl 1):S105-7 doi: 10.1016/j.jaad.2004.09.026[published Online First: Epub Date]].
27. White JM, Powell AM, Brady K, Russell-Jones R. Severe generalized argyria secondary to ingestion of colloidal silver protein. *Clinical and experimental dermatology* 2003;**28**(3):254-6
28. Friedmann DP, Buckley S, Mishra V. Localized Cutaneous Argyria From a Nasal Piercing Successfully Treated With a Picosecond 755-nm Q-Switched Alexandrite Laser. *Dermatologic surgery : official publication for American Society for Dermatologic Surgery [et al.]* 2017;**43**(8):1094-95 doi: 10.1097/dss.0000000000001162[published Online First: Epub Date]].
29. Saager RB, Hassan KM, Kondru C, Durkin AJ, Kelly KM. Quantitative near infrared spectroscopic analysis of Q-Switched Nd:YAG treatment of generalized argyria. *Lasers in Surgery and Medicine* 2013;**45**(1):15-21 doi: doi:10.1002/lsm.22084[published Online First: Epub Date]].
30. Hovenic W, Golda N. Treatment of argyria using the quality-switched 1,064-nm neodymium-doped yttrium aluminum garnet laser: efficacy and persistence of results at 1-year follow-up. *Dermatologic surgery : official publication for American Society for Dermatologic Surgery [et al.]* 2012;**38**(12):2031-4 doi: 10.1111/j.1524-4725.2012.02536.x[published Online First: Epub Date]].
31. Rhee DY, Chang SE, Lee MW, Choi JH, Moon KC, Koh JK. Treatment of argyria after colloidal silver ingestion using Q-switched 1,064-nm Nd:YAG laser. *Dermatologic surgery : official publication for American Society for Dermatologic Surgery [et al.]* 2008;**34**(10):1427-30 doi: 10.1111/j.1524-4725.2008.34302.x[published Online First: Epub Date]].
32. Gottesman SP, Goldberg GN. Immediate successful treatment of argyria with a single pass of multiple q-switched laser wavelengths. *JAMA dermatology* 2013;**149**(5):623-24 doi: 10.1001/jamadermatol.2013.234[published Online First: Epub Date]].

33. Park SW, Kim JH, Shin HT, et al. An Effective Modality for Argyria Treatment: Q-Switched 1,064-nm Nd:YAG Laser. *Annals of Dermatology* 2013;**25**(4):511-2 doi: 10.5021/ad.2013.25.4.511[published Online First: Epub Date]].
34. Fisher NM, Marsh E, Lazova R. Scar-localized argyria secondary to silver sulfadiazine cream. *Journal of the American Academy of Dermatology* 2003;**49**(4):730-2
35. Castells Rodellas A, Torres Peris V, Massmanian A, Ramirez Bosca A, Pellin Perez A, Valcuende Caverio F. [Ultrastructural study of a case of argyria]. *Medicina cutanea ibero-latino-americana* 1989;**17**(6):383-6
36. Reymond JL, Stoebner P, Amblard P. [Cutaneous argyria: an electron microscopic study of four cases with microanalysis X study of one case (author's transl)]. *Annales de dermatologie et de venerologie* 1980;**107**(4):251-5
37. Okan D, Woo K, Sibbald RG. So what if you are blue? Oral colloidal silver and argyria are out: safe dressings are in. *Advances in skin & wound care* 2007;**20**(6):326-30 doi: 10.1097/01.ASW.0000276415.91750.0f[published Online First: Epub Date]].
38. Gulseren D, Arzberger E, Cerroni L, Hofmann-Wellenhof R, Richtig E. Reflectance confocal microscopy and dermatopathologic findings of cutaneous argyria after colloidal silver ingestion. *Journal of the European Academy of Dermatology and Venereology : JEADV* 2017;**31**(3):e178-e79 doi: 10.1111/jdv.13881[published Online First: Epub Date]].
39. Kwon HB, Lee JH, Lee SH, Lee AY, Choi JS, Ahn YS. A Case of Argyria Following Colloidal Silver Ingestion. *Annals of Dermatology* 2009;**21**(3):308-10 doi: 10.5021/ad.2009.21.3.308[published Online First: Epub Date]].
40. Fox JD, Baker JA, Tosti A. Chromonychia in an Asymptomatic Vitamin Consumer. *Skin appendage disorders* 2016;**1**(3):131-3 doi: 10.1159/000441699[published Online First: Epub Date]].
41. Massi D, Santucci M. Human generalized argyria: a submicroscopic and X-ray spectroscopic study. *Ultrastructural pathology* 1998;**22**(1):47-53
42. Jung I, Joo EJ, Suh B, et al. A case of generalized argyria presenting with muscle weakness. *Annals of Occupational and Environmental Medicine* 2017;**29** doi: 10.1186/s40557-017-0201-0[published Online First: Epub Date]].
43. Pardo-Peret P, Sans-Sabrafen J, Boleda Relats M. [Argyriasis. Report of a case (author's transl)]. *Medicina clinica* 1979;**73**(9):386-8
44. Maitre S, Jaber K, Perrot JL, Guy C, Cambazard F. [Increased serum and urinary levels of silver during treatment with topical silver sulfadiazine]. *Annales de dermatologie et de venerologie* 2002;**129**(2):217-9
